# Supplementary material for: Structural Basis of the Immunological Cross-Reactivity between Kiwi and Birch Pollen
Source: MDPI journal article supplement (doi:10.3390/foods12213939), 2023-10-27
Supplement: s1 [file s1]

SUPPLEMENTARY MATERIAL TO:

# Structure and Ligand Binding of the Kiwi Allergens Act c 8 and Act d 8

Ricarda Zeindl <sup>1</sup>, Annika L. Franzmann <sup>1</sup>, Monica L. Fernández-Quintero <sup>2</sup>, Clarissa A. Seidler <sup>2</sup>, Valentin J. Hoerschinger <sup>2</sup>, Klaus R. Liedl <sup>2</sup> and Martin Tollinger <sup>1</sup>

<sup>1</sup> Institute of Organic Chemistry, Center for Molecular Biosciences Innsbruck (CMBI), University of Innsbruck, Innsbruck, Austria

<sup>2</sup> Institute of General, Inorganic and Theoretical Chemistry, Center for Molecular Biosciences Innsbruck (CMBI), University of Innsbruck, Innsbruck, Austria

**Table S1.** Summary of restraints used for NMR structure determination of Act c 8 and Act d 8 and refinement statistics.

|                                                  | Act c 8 | Act d 8 |
|--------------------------------------------------|---------|---------|
| PDB ID                                           | 8QHI    | 8QHH    |
| <b>Experimental Restraints</b>                   |         |         |
| NOE-based distance restraints                    | 4241    | 1602    |
| intraresidue [i = j]                             | 1285    | 327     |
| sequential [  i - j  = 1 ]                       | 817     | 547     |
| medium range [ 1 <  i - j  < 5 ]                 | 753     | 335     |
| long range [  i - j  ≥ 5 ]                       | 1386    | 393     |
| Dihedral angle restraints                        | 276     | 256     |
| Hydrogen bond restraints                         | 178     | 136     |
| Total number of restraints                       | 4695    | 1994    |
| Total restraints per residue                     | 29.7    | 12.8    |
| Total long range restraints per residue          | 8.8     | 2.5     |
| <b>Restraint Violations</b>                      |         |         |
| average distance violation                       | 1.74 Å  | 1.07 Å  |
| maximal distance violation                       | 2.02 Å  | 1.22 Å  |
| average dihedral angle violation                 | 28.56°  | 12.11°  |
| maximal dihedral angle violation                 | 32.44°  | 13.40°  |
| <b>RMSD Values <sup>1</sup></b>                  |         |         |
| backbone atoms                                   | 0.4 Å   | 0.5 Å   |
| heavy atoms                                      | 0.5 Å   | 0.6 Å   |
| bond lengths                                     | 0.013 Å | 0.013 Å |
| bond angles                                      | 2.2°    | 2.0°    |
| <b>Ramachandran Plot Statistics <sup>1</sup></b> |         |         |
| most favored regions                             | 88.6%   | 93.1 %  |
| allowed regions                                  | 11.0%   | 5.6 %   |
| disallowed regions                               | 0.4%    | 1.2 %   |

<sup>1</sup> Determined using the Protein Structure Validation Software package PSVS.

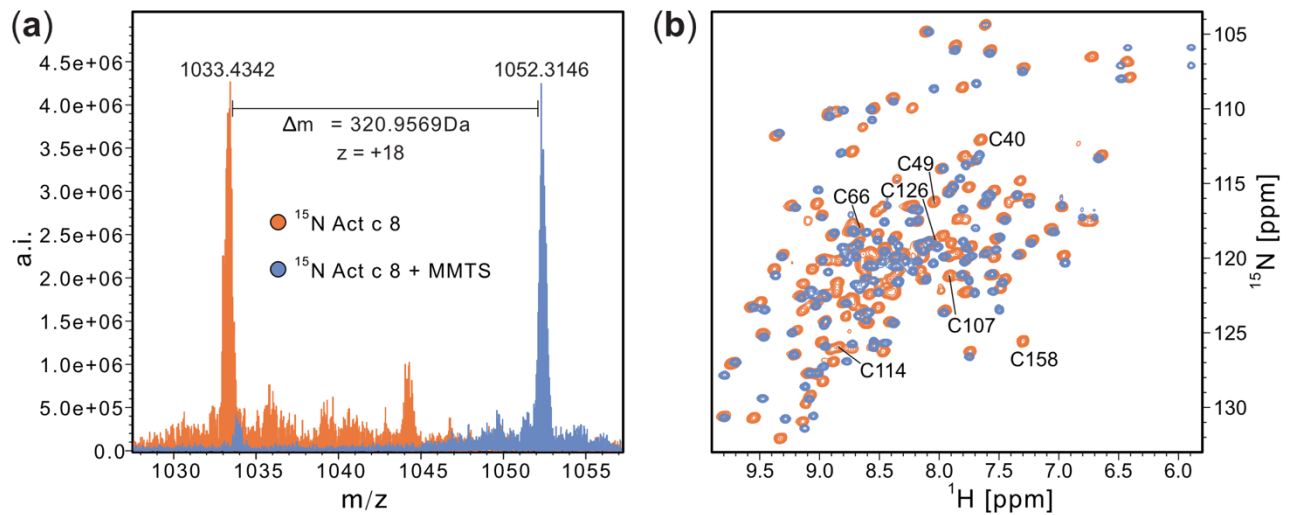

**Figure S1:** (a) ESI-MS spectra of  $^{15}\text{N}$ -labeled Act c 8 before (orange) and after (blue) addition of methyl methanethiosulfonate MMTS, charge state  $z = +18$ . The observed mass shift,  $\Delta m$ , of 320.9569 Da corresponds to the covalent attachment of methylthio groups to all seven cysteines in this protein. (b) 700 MHz  $^1\text{H}$ - $^{15}\text{N}$ -HSQC of  $^{15}\text{N}$ -labeled Act c 8 before (orange) and after (blue) addition of MMTS. The backbone amide resonances of the seven cysteine residues in Act c 8 are labeled in the spectrum that was obtained before MMTS was added. The chemical shifts of all cysteines are affected by MMTS treatment, along with numerous other resonances. For the MMTS modified protein resonances were not assigned. Experimental conditions: 0.4 mM  $^{15}\text{N}$ -labeled Act c 8 in 20 mM  $\text{Na}_2\text{HPO}_4$ , pH 6.9, 9 %  $\text{D}_2\text{O}$ , 25 °C.
